# Supplementary material for: Effect of graphitic carbon nitride microstructures on the activity and selectivity of photocatalytic CO2 reduction under visible light
Source: Royal Society of Chemistry journal article supplement (doi:10.1039/c3cy20822b), 2013-01-01
Supplement: c3cy20822b.pdf [file c3cy20822b.pdf]

## Supplementary Information for Catalysis Science & Technology

### Effect of graphitic carbon nitride microstructures on the activity and selectivity of photocatalytic CO<sub>2</sub> reduction under visible light

Jin Mao, Tianyou Peng,\* Xiaohu Zhang, Kan Li, Liqun Ye, Ling Zan

College of Chemistry and Molecular Science, Wuhan University, Wuhan 430072, P. R. China

According to the XPS spectra shown in Fig. 4, the FWHM of the feature peak and the fitted parameters are listed in Table S1. As can be seen, there are difference in the FWHM and area of the each feature between the two materials. After exact calculation, the element abundance ratios of C:N:O were 0.744:1:0.047 for u-g-C<sub>3</sub>N<sub>4</sub> and 0.745:1:0.069 for m-g-C<sub>3</sub>N<sub>4</sub>, respectively. The C1s spectra in Fig. 2b show three peaks at 288.4, 286.4 and 284.8 eV with peak area ratio of 0.32:0.12:1 for u-g-C<sub>3</sub>N<sub>4</sub> and 0.29:0.15:1 for m-g-C<sub>3</sub>N<sub>4</sub>, respectively. And N1s spectra in Fig. 2c show three peaks at 398.7, 399.6, 401.2 and 404.2 eV with peak area ratio of 1:0.89:0.18:0.02 for u-g-C<sub>3</sub>N<sub>4</sub> and 1:0.54:0.28:0.018 for m-g-C<sub>3</sub>N<sub>4</sub>, respectively.

**Table S1.** The fitted XPS parameters of u-g-C<sub>3</sub>N<sub>4</sub> and m-g-C<sub>3</sub>N<sub>4</sub>

| Binding Energy (eV)               |      | 284.8  | 286.4  | 288.4   | 398.7   | 399.6   | 401.2  | 404.2 | 532.8  |
|-----------------------------------|------|--------|--------|---------|---------|---------|--------|-------|--------|
| u-g-C <sub>3</sub> N <sub>4</sub> | FWHM | 1.57   | 3.29   | 1.61    | 1.37    | 1.77    | 1.38   | 1.08  | 2.55   |
|                                   | Area | 4956.2 | 1882.5 | 15476.9 | 14343.5 | 12760.5 | 2613.9 | 287.8 | 1403.2 |
| m-g-C <sub>3</sub> N <sub>4</sub> | FWHM | 1.65   | 3.01   | 1.75    | 1.68    | 1.52    | 1.9    | 1.2   | 2.39   |
|                                   | Area | 2566.8 | 1356.9 | 8842.8  | 9260.4  | 5092.3  | 2602.8 | 172.6 | 1187.1 |

Fig. S1 showed the GC-MS data of the products derived from the present CO<sub>2</sub> photoreduction system containing g-C<sub>3</sub>N<sub>4</sub> suspension under visible-light ( $\lambda \geq 420$  nm) irradiation. As can be seen, the GC-MS spectrum of the products is consistent with standard GC-MS spectrum of methanol and ethanol, indicating that the products were methanol and ethanol rather than dimethyl ether and other C1 compounds.

\* Corresponding author. Tel. & Fax: +86 27 68752237.  
E-mail address: typeng@whu.edu.cn (T. Peng).

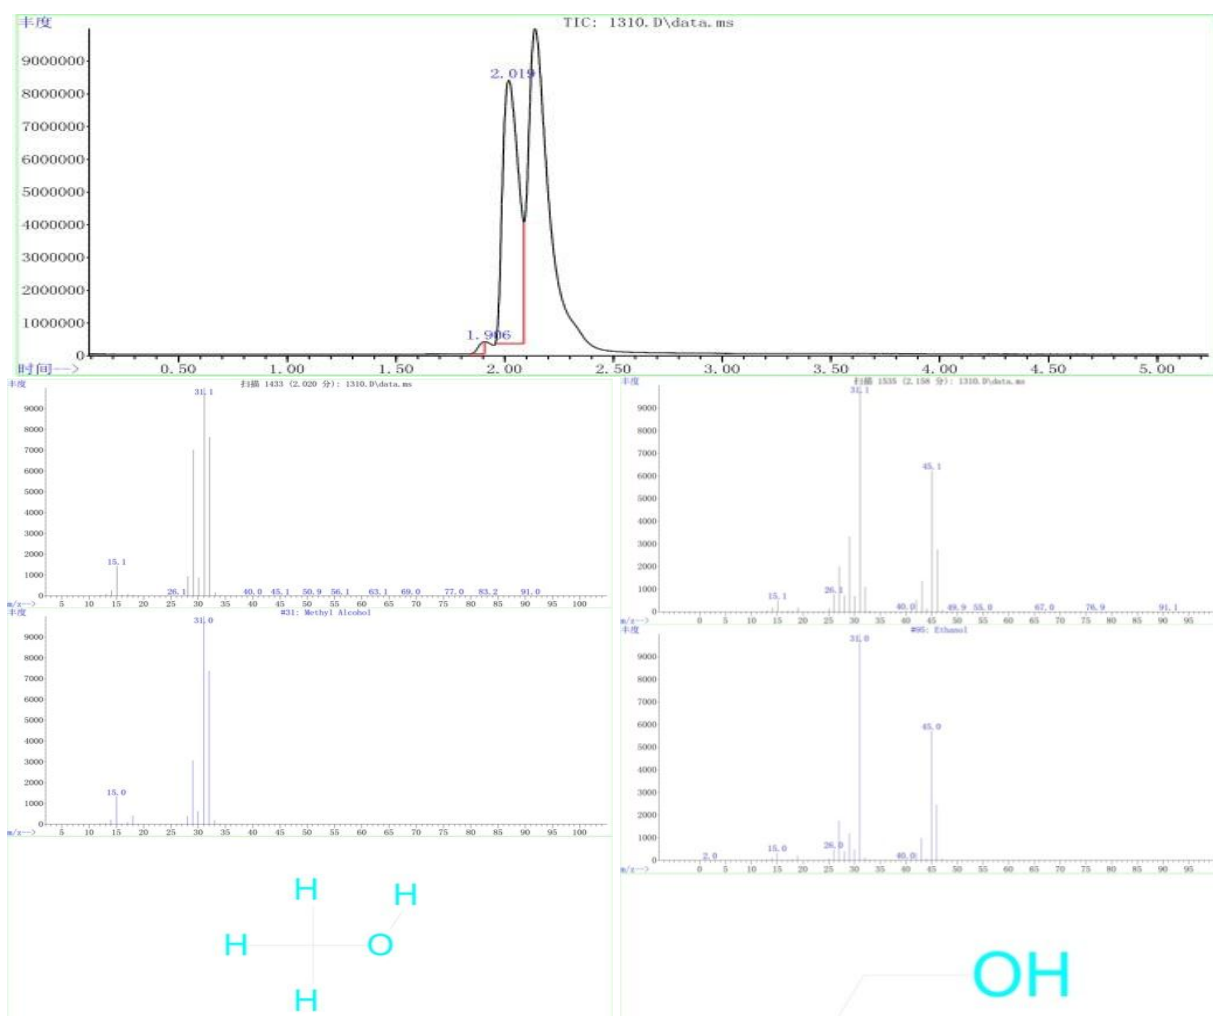

**Fig. S1** GC-MS spectrum of the products derived from the CO<sub>2</sub> photoreduction system containing g-C<sub>3</sub>N<sub>4</sub> suspension under visible-light ( $\lambda \geq 420$  nm) irradiation.
